# Supplementary material
Source: Springer Nature journal article supplement (https://www.springermedizin.de/resource/supplementary/13063_2010_542_MOESM1_ESM.pdf/9618866)
Supplement: MOESM1 [file 9618866]

### **STAGE 1**

Admission to the ICU  
Ventilation PaO<sub>2</sub> ≥11kpa  
PaCO<sub>2</sub> 4.5-5.0kpa  
Sedation  
Analgesia ±paralysis  
30° head of bed elevation  
Intravenous fluids ±  
inotropes to maintain mean  
arterial pressure ≥80mmHg

Ventriculostomy±  
cerebrospinal fluid drainage  
Surgical removal of space  
occupying lesions  
± prophylactic  
anticonvulsants

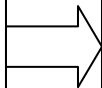

### **STAGE 2**

Mannitol (maintain serum  
osmolarity <315 mOsm/kg)

Hypertonic saline (avoid in  
hyponatraemic patients,  
caution in patients with  
cardiac or pulmonary  
problems)

Inotropes to maintain CPP  
≥60mmHg

Monitor blood magnesium  
levels and replace as  
required

**Barbiturates not  
permitted**  
± therapeutic hypothermia

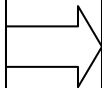

### **STAGE 3**

Barbiturate therapy

Decompressive  
craniectomy
